# Supplementary material
Source: HighWire-hosted journal article supplement (https://jnm.snmjournals.org/highwire/filestream/95496/field_highwire_adjunct_files/0/222513_Supplemental_Data.pdf)
Supplement: 222513_Supplemental_Data.pdf [file 222513_Supplemental_Data.pdf]

## Log files of the data analyses

For the analyses of the dichotomous scan result (variable `outcome` in print screen below), based on individual scan interpretations, the following syntax in STATA © 14 was used:

```
melogit outcome i.method || PIN: || observer:, or
```

For the analyses of the number of lesions (variable `Nlesions` in print screen below), the following syntax in Stata 14 was used:

```
mepoisson Nlesions i.method || PIN: || observer:, irr
```

Data Editor (Browse) - [Reconstudy\_Revisions\_2 - extra lang\_2.0.dta]

File Edit View Data Tools

PIN[1] 1

|    | PIN | Reading | observer | method  | outcome | Nlesions |
|----|-----|---------|----------|---------|---------|----------|
| 1  | 1   | 1       | 1        | 4mm     | yes     | 1        |
| 2  | 1   | 25      | 2        | 4mm     | yes     | 1        |
| 3  | 1   | 49      | 3        | 4mm     | yes     | 1        |
| 4  | 1   | 73      | 4        | 4mm     | no      | 0        |
| 5  | 1   | 1       | 1        | 4mm+PSF | yes     | 1        |
| 6  | 1   | 25      | 2        | 4mm+PSF | yes     | 1        |
| 7  | 1   | 49      | 3        | 4mm+PSF | yes     | 1        |
| 8  | 1   | 73      | 4        | 4mm+PSF | no      | 0        |
| 9  | 1   | 1       | 1        | 2mm     | yes     | 2        |
| 10 | 1   | 25      | 2        | 2mm     | yes     | 1        |
| 11 | 1   | 49      | 3        | 2mm     | yes     | 1        |
| 12 | 1   | 73      | 4        | 2mm     | yes     | 1        |
| 13 | 1   | 1       | 1        | 2mm+PSF | yes     | 2        |
| 14 | 1   | 25      | 2        | 2mm+PSF | yes     | 1        |
| 15 | 1   | 49      | 3        | 2mm+PSF | yes     | 1        |
| 16 | 1   | 73      | 4        | 2mm+PSF | yes     | 1        |
| 17 | 2   | 2       | 1        | 4mm     | yes     | 11       |
| 18 | 2   | 26      | 2        | 4mm     | yes     | 20       |
| 19 | 2   | 50      | 3        | 4mm     | yes     | 6        |
| 20 | 2   | 74      | 4        | 4mm     | yes     | 1        |

PIN=patient identification number

For the analyses of the agreement (variable `agree` in print screen below), the following syntax in Stata 14 was used:

```
melogit agree i.method || PIN: || pair:, or
```

Data Editor (Browse) - [Reconstudy\_Revisions\_2 - agreement\_2.0.dta]

File Edit View Data Tools

PIN[1] 1

|    | PIN | method  | pair | agree |
|----|-----|---------|------|-------|
| 1  | 1   | 4mm     | 12   | yes   |
| 2  | 1   | 4mm     | 13   | yes   |
| 3  | 1   | 4mm     | 14   | no    |
| 4  | 1   | 4mm     | 23   | yes   |
| 5  | 1   | 4mm     | 24   | no    |
| 6  | 1   | 4mm     | 24   | no    |
| 7  | 1   | 4mm+PSF | 12   | yes   |
| 8  | 1   | 4mm+PSF | 13   | yes   |
| 9  | 1   | 4mm+PSF | 14   | no    |
| 10 | 1   | 4mm+PSF | 23   | yes   |
| 11 | 1   | 4mm+PSF | 24   | no    |
| 12 | 1   | 4mm+PSF | 24   | no    |
| 13 | 1   | 2mm     | 12   | yes   |
| 14 | 1   | 2mm     | 13   | yes   |
| 15 | 1   | 2mm     | 14   | yes   |
| 16 | 1   | 2mm     | 23   | yes   |
| 17 | 1   | 2mm     | 24   | yes   |
| 18 | 1   | 2mm     | 24   | yes   |
| 19 | 1   | 2mm+PSF | 12   | yes   |
| 20 | 1   | 2mm+PSF | 13   | yes   |
| 21 | 1   | 2mm+PSF | 14   | yes   |
| 22 | 1   | 2mm+PSF | 23   | yes   |
| 23 | 1   | 2mm+PSF | 24   | yes   |
| 24 | 1   | 2mm+PSF | 24   | yes   |
| 25 | 2   | 4mm     | 12   | yes   |
| 26 | 2   | 4mm     | 13   | yes   |
| 27 | 2   | 4mm     | 14   | yes   |
| 28 | 2   | 4mm     | 23   | yes   |
| 29 | 2   | 4mm     | 24   | yes   |
| 30 | 2   | 4mm     | 24   | yes   |

PIN=patient identification number
